# Supplementary material for: Performance of glomerular filtration rate estimation equations in Congolese healthy adults: The inopportunity of the ethnic correction
Source: PubMed Central journal article supplement (PMC5834186; doi:10.1371/journal.pone.0193384), 2018-03-02
Supplement: pone.0193384.s001.pdf [file pone.0193384.s001.pdf]

| <b>Equations</b>   | <b>Spearman correlation<br/><math>\rho</math> (95% CI)</b> |
|--------------------|------------------------------------------------------------|
| MDRD               | 0.600 (0.451-0.716)                                        |
| MDRD nef           | 0.600 (0.451-0.716)                                        |
| CKD-EPI SCr        | 0.636 (0.490-0.740)                                        |
| CKD-EPI SCr nef    | 0.636 (0.490-0.740)                                        |
| CKD-EPI Cys        | 0.557 (0.399-0.684)                                        |
| CKD-EPI SCrCys     | 0.661 (0.524-0.759)                                        |
| CKD-EPI SCrCys nef | 0.661 (0.525-0.760)                                        |
