# Supplementary material for: Performance of glomerular filtration rate estimation equations in Congolese healthy adults: The inopportunity of the ethnic correction
Source: PubMed Central journal article supplement (PMC5834186; doi:10.1371/journal.pone.0193384), 2018-03-02
Supplement: pone.0193384.s002.pdf [file pone.0193384.s002.pdf]

**A**

| <b>Equations</b>      | <b>Bias</b> | <b>SD</b> | <b>P30</b> |
|-----------------------|-------------|-----------|------------|
| MDRD                  | 17          | 35        | 78         |
| MDRD nef              | -3          | 29        | 82         |
| CKD-EPI SCr           | 16          | 21        | 76         |
| CKD-EPI SCr nef       | 1           | 19        | 80         |
| CKD-EPI SCys          | -5          | 16        | 91         |
| CKD-EPI SCrCys        | 5           | 15        | 89         |
| CKD-EPI SCrCys<br>nef | -2          | 14        | 93         |

**B**

| <b>Equations</b>      | <b>Bias</b> | <b>SD</b> | <b>P30</b> |
|-----------------------|-------------|-----------|------------|
| MDRD                  | 11          | 17        | 81         |
| MDRD nef              | -7          | 15        | 90         |
| CKD-EPI SCr           | 18          | 17        | 71         |
| CKD-EPI SCr nef       | 3           | 15        | 83         |
| CKD-EPI SCys          | 7           | 14        | 92         |
| CKD-EPI SCrCys        | 12          | 14        | 85         |
| CKD-EPI SCrCys<br>nef | 5           | 13        | 92         |
