# Supplementary material for: Performance of glomerular filtration rate estimation equations in Congolese healthy adults: The inopportunity of the ethnic correction
Source: PubMed Central journal article supplement (PMC5834186; doi:10.1371/journal.pone.0193384), 2018-03-02
Supplement: pone.0193384.s003.pdf [file pone.0193384.s003.pdf]

**A**

| <b>Equations</b>      | <b>Bias</b> | <b>SD</b> | <b>P30</b> |
|-----------------------|-------------|-----------|------------|
| MDRD                  | 19          | 23        | 61         |
| MDRD nef              | 3           | 19        | 77         |
| CKD-EPI SCr           | 23          | 21        | 55         |
| CKD-EPI SCr nef       | 10          | 18        | 65         |
| CKD-EPI SCys          | 10          | 13        | 84         |
| CKD-EPI SCrCys        | 16          | 14        | 71         |
| CKD-EPI SCrCys<br>nef | 9           | 13        | 84         |

**B**

| <b>Equations</b>      | <b>Bias</b> | <b>SD</b> | <b>P30</b> |
|-----------------------|-------------|-----------|------------|
| MDRD                  | 13          | 38        | 81         |
| MDRD nef              | -6          | 31        | 87         |
| CKD-EPI SCr           | 12          | 22        | 74         |
| CKD-EPI SCr nef       | -2          | 19        | 81         |
| CKD-EPI SCys          | -2          | 15        | 94         |
| CKD-EPI SCrCys        | 5           | 14        | 90         |
| CKD-EPI SCrCys<br>nef | -3          | 13        | 94         |

**C**

| <b>Equations</b> | <b>Bias</b> | <b>SD</b> | <b>P30</b> |
|------------------|-------------|-----------|------------|
| MDRD             | 9           | 14        | 97         |
| MDRD nef         | -12         | 12        | 94         |
| CKD-EPI SCr      | 16          | 13        | 90         |
| CKD-EPI SCr nef  | -1          | 12        | 100        |
| CKD-EPI SCys     | -4          | 16        | 97         |
| CKD-EPI SCrCys   | 6           | 13        | 100        |

---

|                             |    |    |     |
|-----------------------------|----|----|-----|
| CKD-EPI S <sub>Cr</sub> Cys | -2 | 13 | 100 |
| nef                         |    |    |     |

---
