# Supplementary material for: Performance of glomerular filtration rate estimation equations in Congolese healthy adults: The inopportunity of the ethnic correction
Source: PubMed Central journal article supplement (PMC5834186; doi:10.1371/journal.pone.0193384), 2018-03-02
Supplement: pone.0193384.s004.pdf [file pone.0193384.s004.pdf]

**A**

| <b>Equations</b>      | <b>Bias</b> | <b>SD</b> | <b>P30</b> |
|-----------------------|-------------|-----------|------------|
| MDRD                  | 20          | 24        | 75         |
| MDRD nef              | -2          | 22        | 95         |
| CKD-EPI SCr           | 29          | 18        | 60         |
| CKD-EPI SCr nef       | 11          | 17        | 80         |
| CKD-EPI SCys          | 7           | 18        | 90         |
| CKD-EPI SCrCys        | 17          | 15        | 80         |
| CKD-EPI SCrCys<br>nef | 8           | 15        | 85         |

**B**

| <b>Equations</b>      | <b>Bias</b> | <b>SD</b> | <b>P30</b> |
|-----------------------|-------------|-----------|------------|
| MDRD                  | 10          | 15        | 89         |
| MDRD nef              | -10         | 13        | 94         |
| CKD-EPI SCr           | 18          | 14        | 83         |
| CKD-EPI SCr nef       | 2           | 12        | 89         |
| CKD-EPI SCys          | -1          | 16        | 94         |
| CKD-EPI SCrCys        | 8           | 12        | 84         |
| CKD-EPI SCrCys<br>nef | 0           | 12        | 100        |

**C**

| <b>Equations</b>      | <b>Bias</b> | <b>SD</b> | <b>P30</b> |
|-----------------------|-------------|-----------|------------|
| MDRD                  | 12          | 17        | 83         |
| MDRD nef              | -5          | 15        | 89         |
| CKD-EPI SCr           | 20          | 16        | 78         |
| CKD-EPI SCr nef       | 5           | 15        | 83         |
| CKD-EPI SCys          | 8           | 15        | 83         |
| CKD-EPI SCrCys        | 14          | 12        | 89         |
| CKD-EPI SCrCys<br>nef | 6           | 12        | 94         |

**D**

| <b>Equations</b>      | <b>Bias</b> | <b>SD</b> | <b>P30</b> |
|-----------------------|-------------|-----------|------------|
| MDRD                  | 12          | 36        | 76         |
| MDRD nef              | -74         | 30        | 76         |
| CKD-EPI SCr           | 9           | 21        | 73         |
| CKD-EPI SCr nef       | -4          | 18        | 78         |
| CKD-EPI SCys          | -3          | 14        | 95         |
| CKD-EPI SCrCys        | 3           | 15        | 86         |
| CKD-EPI SCrCys<br>nef | -4          | 14        | 92         |
